# Supplementary material
Source: Springer Nature journal article supplement (https://www.springermedizin.de/resource/supplementary/13018_2009_287_MOESM8_ESM.pdf/9636708)

R

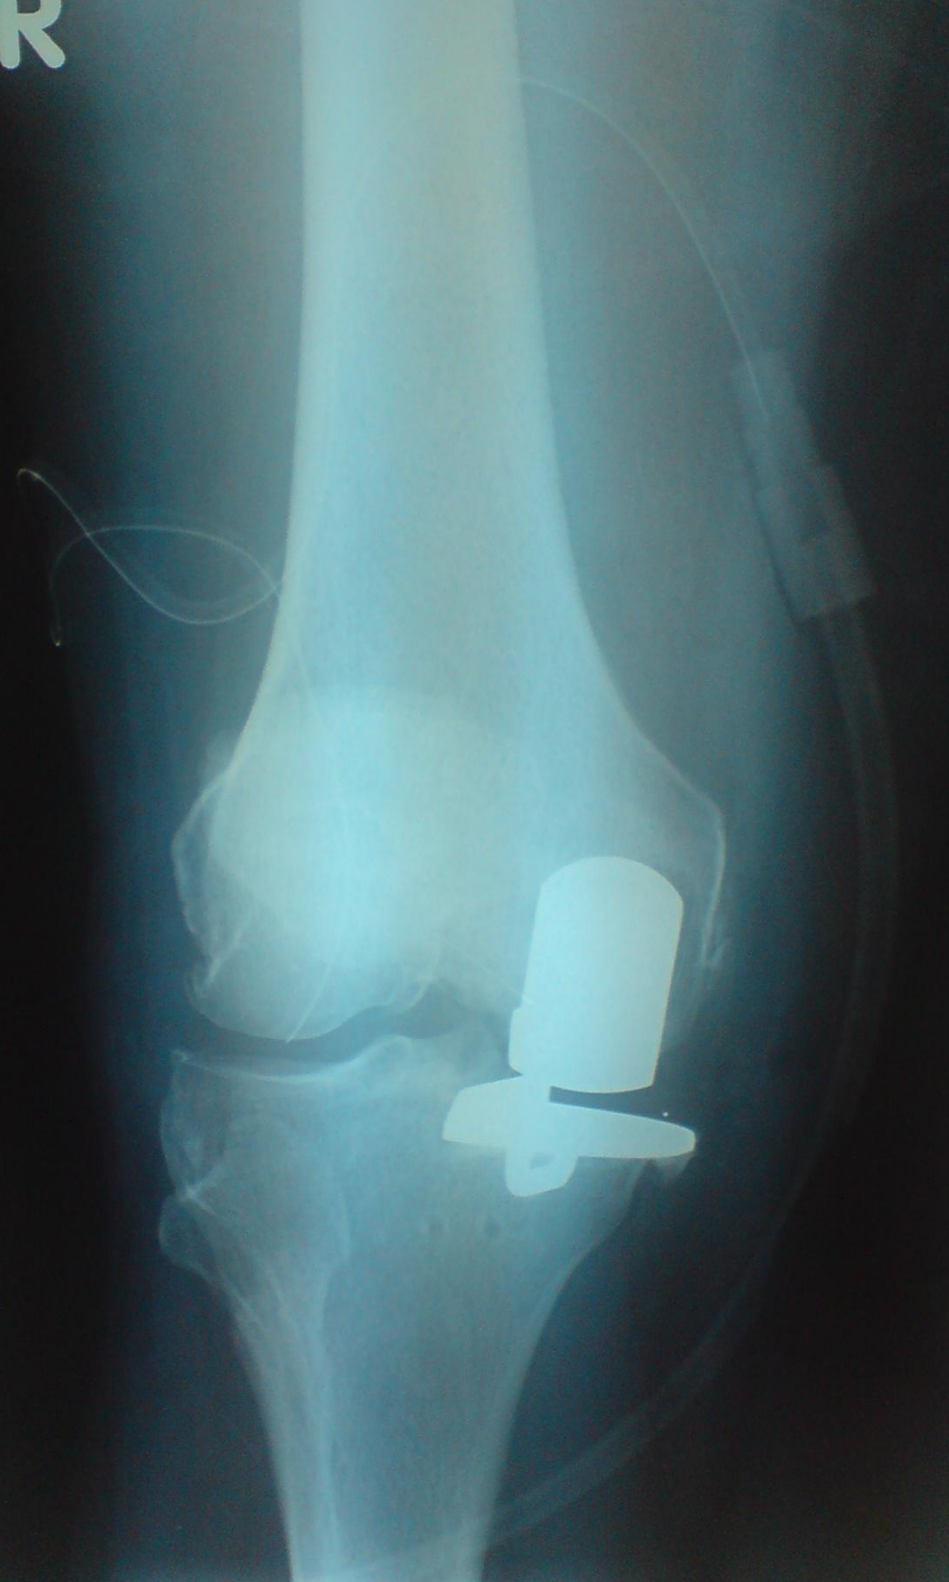

Supplement: MOESM8 [file 9636708]
